# Supplementary material for: Periostin plays a critical role in the cell cycle in lung fibroblasts
Source: PubMed Central journal article supplement (PMC6993476; doi:10.1186/s12931-020-1299-0), 2020-01-30

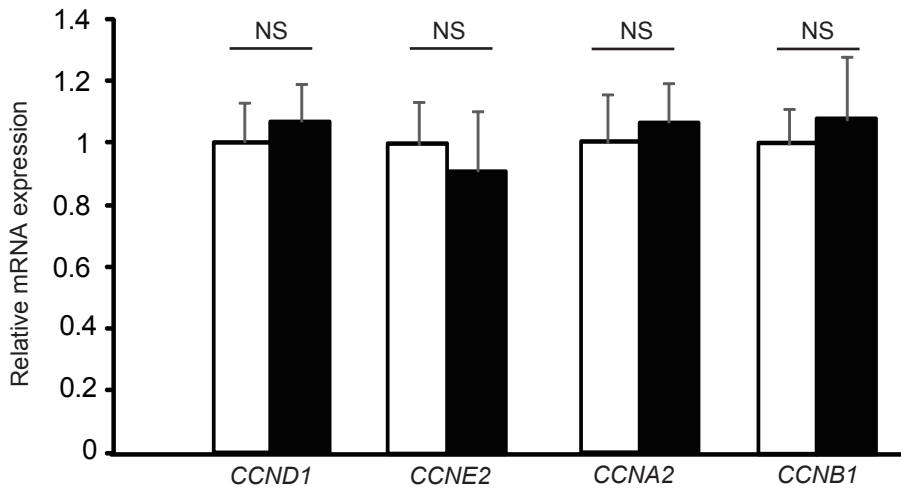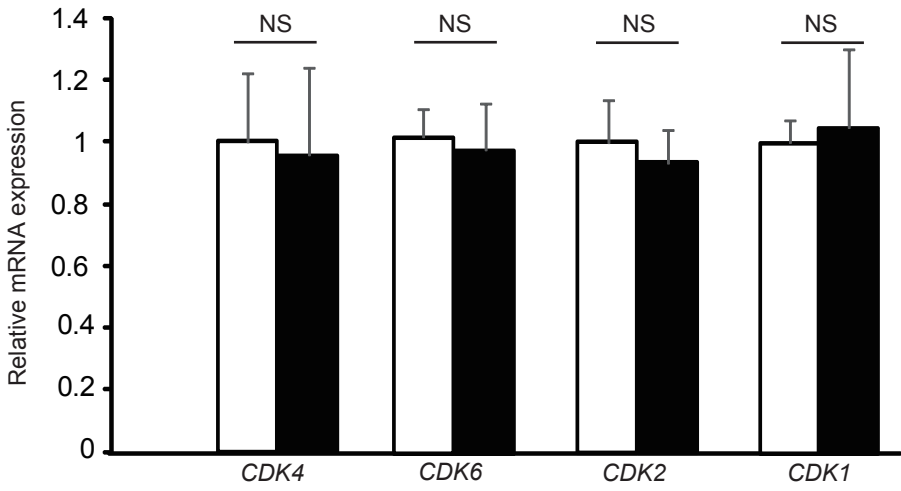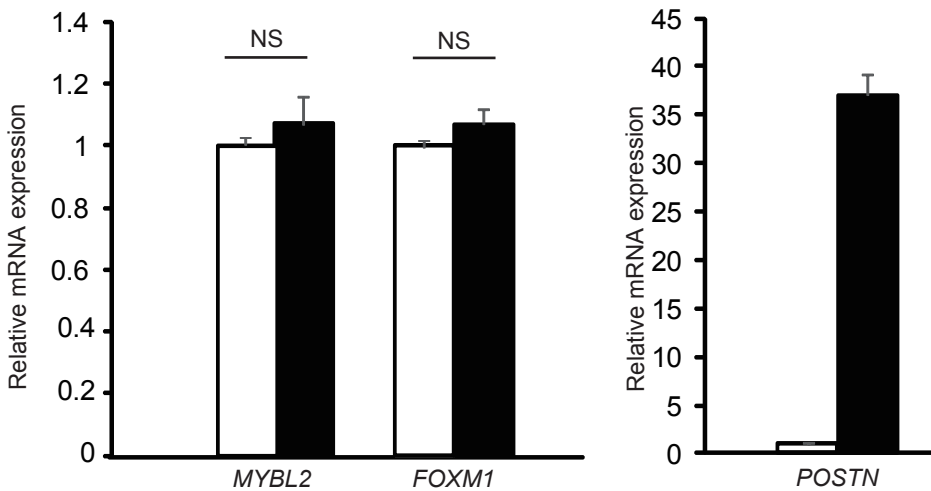

a

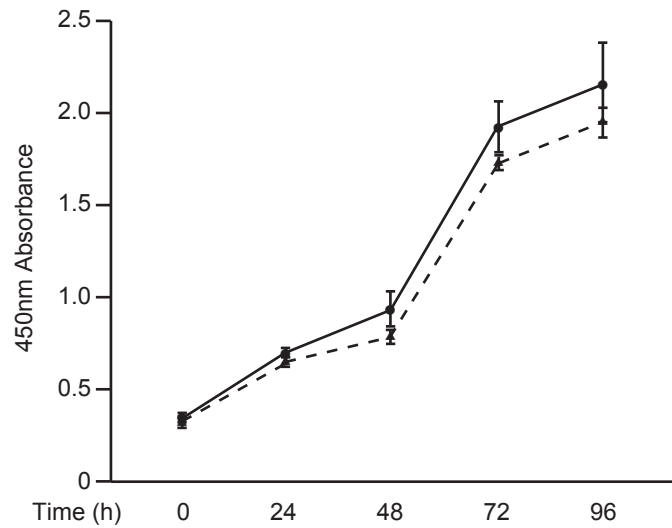

b

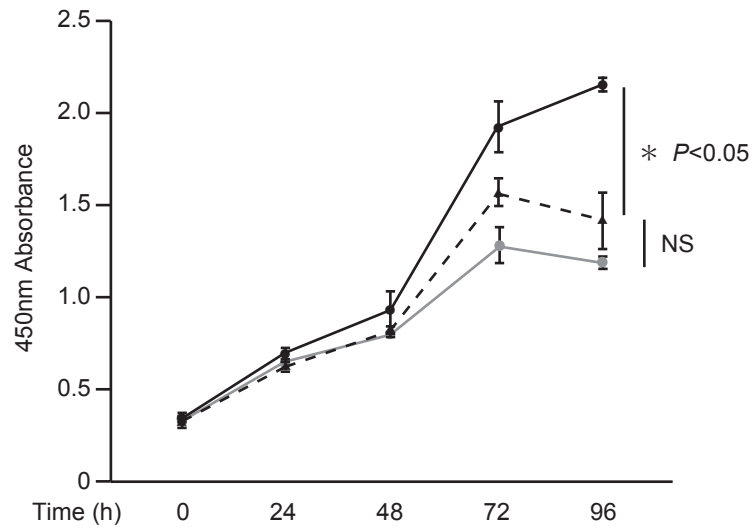

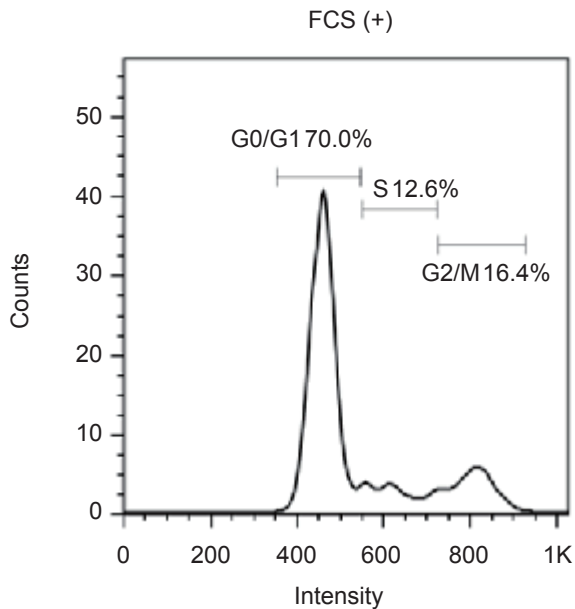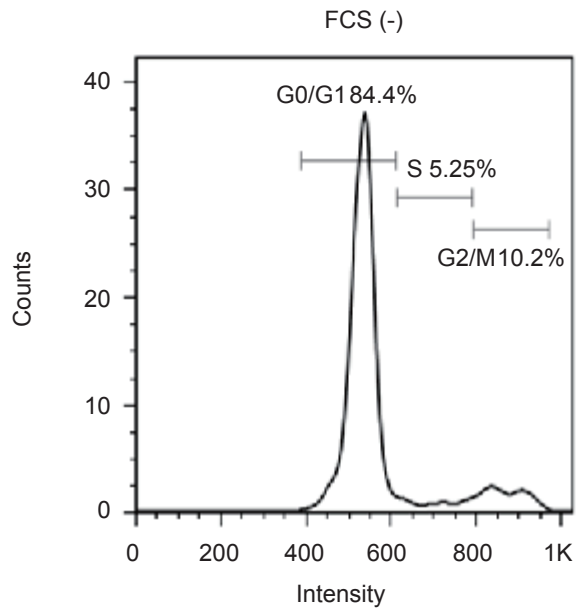

Supplement: 12931_2020_1299_MOESM1_ESM.pdf [file 12931_2020_1299_MOESM1_ESM.pdf]
