# Supplementary material for: Periostin plays a critical role in the cell cycle in lung fibroblasts
Source: PubMed Central journal article supplement (PMC6993476; doi:10.1186/s12931-020-1299-0), 2020-01-30
Supplement: 12931_2020_1299_MOESM2_ESM.pdf [file 12931_2020_1299_MOESM2_ESM.pdf]

Table S1 Primer sequences used in qRT-PCR

| Gene  | Primer sequence                                                                                    |
|-------|----------------------------------------------------------------------------------------------------|
| GAPDH | Forward Primer: 5' – TGCACCACCAACTGCTTAGC – 3'<br>Reverse Primer: 5' – GGCATGGACTGTGGTCATGAG – 3'  |
| POSTN | Forward Primer: 5' – CAGAGAAATCCCTCCATGAAA – 3'<br>Reverse Primer: 5' – CAGGAGCTCTTTCAAGTCYGC – 3' |
| CCNA2 | Forward Primer: 5' – CCTGCAAAGTGCAGCAATAA – 3'<br>Reverse Primer: 5' – AAAGGCAGCTCCAGCAATAA – 3'   |
| CCNB1 | Forward Primer: 5' – AAGCCCAATGGAAACATCTG – 3'<br>Reverse Primer: 5' – GGATCAGCTCCATCTTCTGC – 3'   |
| CCND1 | Forward Primer: 5' – AACTACCTGGACCGCTTCTCCT – 3'<br>Reverse Primer: 5' – CCACTTGAGCTTGTTACCA – 3'  |
| CCNE2 | Forward Primer: 5' – CAGGTTTGGAGTGGGACAGT – 3'<br>Reverse Primer: 5' – CTCCATTGCACACTGGTGAC – 3'   |
| CDK1  | Forward Primer: 5' –GGTCAAGTGGTAGCCATGAAA – 3'<br>Reverse Primer: 5' –TCCTGCATAAGCACATCCTG – 3'    |
| CDK2  | Forward Primer: 5' – CATTCTCTTCCCCTCATCA – 3'<br>Reverse Primer: 5' – CAGGGACTCCAAAAGCTCTG – 3'    |
| CDK4  | Forward Primer: 5' – GAAACTCTGAAGCCGACCAG – 3'<br>Reverse Primer: 5' – AGGCAGAGATTCGCTTGTGT – 3'   |
| CDK6  | Forward Primer: 5' – TGCACAGTGTACGAACAGA – 3'<br>Reverse Primer: 5' – ACCTCGGAGAAGCTGAAACA – 3'    |
| E2F1  | Forward Primer: 5' – TGCAGAGCAGATGGTTATGG – 3'<br>Reverse Primer: 5' – CTCAGGGCACAGGAAAACAT – 3'   |
| E2F2  | Forward Primer: 5' – CCTTGGAGGCTACTGACAGC – 3'<br>Reverse Primer: 5' – CCACAGGTAGTCGTCTGGT – 3'    |
| E2F3  | Forward Primer: 5' – GGGAAACCTTTCTCCTCTGG – 3'<br>Reverse Primer: 5' – GGGGAGGCAGTAAGTTCACA – 3'   |
| MYBL2 | Forward Primer: 5' – CCATGGACCAAAGAGGAAGA – 3'<br>Reverse Primer: 5' – CTCAGGGTTGAGGTGTTGT – 3'    |
| FOXM1 | Forward Primer: 5' – TCTCGGAGGAAACAGCATCT – 3'<br>Reverse Primer: 5' – CAGAGGAGTCTGCTGGGAAC – 3'   |
